# Supplementary material for: Postural Ataxia in Cerebellar Downbeat Nystagmus: Its Relation to Visual, Proprioceptive and Vestibular Signals and Cerebellar Atrophy
Source: PLoS One. 2017 Jan 5;12(1):e0168808. doi: 10.1371/journal.pone.0168808 (PMC5215796; doi:10.1371/journal.pone.0168808)
Supplement: S1 Table — Modulation of DBN by graviceptive input (head pitched forward, backward) is indicated by mild (+) or strong (++) increase of SPV of DBN in the head bended forward position or its absence (-). Clinical examination particularly looked for extracerebellar signs, e.g. polyneuropathy or peripheral vestibular lesions. Assessment of clinical disability by cerebellar dysfunction are given by scale for the assessment and rating of ataxia (SARA), the Tinetti balance and gait evaluation score, the Vertigo Symptom Scale (VSS) and Vertigo Handicap Questionnaire (VHQ in %). (XLS) [file pone.0168808.s002.xls]

## Sheet: Tabelle1
patient	age	gender	symptoms	signs	gravity	disease duration (years)	SARA	Tinetti	MOCA	VSS (%)	VHQ (%)
1	72.3333	m	oscillopsia, gait unsteadiness	DBN, ataxia of gait & stance	++	12	19	13	24	54.41	60
2	74.5	f	oscillopsia, gait unsteadiness	DBN, mild ataxia of gait & stance	+	4.17	9	19	22	54.41	68
3	78.5833	m	blurred vision gait unsteadiness	DBN, mild ataxia of gait & stance	-	2.7	6	23	28	0.74	3.26
4	56.25	m	blurred vision gait unsteadiness	DBN, mild ataxia of gait & stance	+	4	7	22	28	33.09	56
5	78.5833	f	oscillopsia, gait unsteadiness	DBN, ataxia of gait & stance	++	8	8	18	22	20.59	61
6	72.3333	f	oscillopsia, gait unsteadiness	DBN	++	12	8	21	29	50.74	60.23
7	75.0833	m	blurred vision gait unsteadiness	DBN, mild ataxia of gait & stance	-	3.5	6	24	24	17.65	26
8	81.25	m	oscillopsia, gait unsteadiness	DBN	-	8	7	26	30	11.03	27
9	44.6667	m	oscillopsia, gait unsteadiness	DBN, mild ataxia of gait & stance	+	9	2	27	27	35.29	66
10	74.25	f	oscillopsia, gait unsteadiness	DBN, ataxia of gait & stance	+	1	9.5	18	24	16.18	44.32
11	84.3333	f	oscillopsia, gait unsteadiness	DBN, mild ataxia of gait & stance	++	7	10	20	26	41.91	69
12	74	m	oscillopsia, gait unsteadiness	DBN, mild ataxia of gait & stance	-	1	3	23	28	21.32	28.57
13	72.8333	f	oscillopsia, gait unsteadiness	DBN, ataxia of gait & stance	+	4.8	3	25	29	10.29	41.25
14	77.6667	m	blurred vision gait unsteadiness	DBN	+	5	17	12	24	33.82	89.47
15	77.1667	f	oscillopsia, gait unsteadiness	DBN, ataxia of gait & stance	+	m.v.	2	21	29	5.88	50
16	78.0833	f	blurred vision gait unsteadiness	DBN, ataxia of gait & stance	+	6.3	13	9	27	52.21	91
17	74.0833	f	oscillopsia, gait unsteadiness	DBN	+	4	7	21	22	6.62	42.39
18	76.1667	f	blurred vision gait unsteadiness	DBN, mild ataxia of gait & stance	+	m.v.	12	18	27	43.38	61
19	76.5833	f	oscillopsia, gait unsteadiness	DBN, ataxia of gait & stance	+	m.v.	8	19	23	14.71	74
20	72.6667	f	oscillopsia, gait unsteadiness	DBN, mild ataxia of gait & stance	++	4.7	5	24	28	4.41	23.75
21	73.0833	m	oscillopsia, gait unsteadiness	DBN, mild ataxia of gait	+	2	9	17	27	39.71	77
22	76.0833	m	blurred vision gait unsteadiness	DBN, ataxia of gait & stance	++	6.7	7.5	25	26	7.35	67
23	69.5833	m	oscillopsia, gait unsteadiness	DBN, mild ataxia of gait & stance	-	m.v.	6.5	21	28	25	55
24	58.25	f	gait unsteadiness	DBN, ataxia of gait	+	m.v.	m.v.	m.v.	m.v.	45.59	64
25	71	f	blurred vision gait unsteadiness	DBN, mild ataxia of gait & stance	-	5	7.5	19	29	27.21	50
26	87.4167	f	oscillopsia, gait unsteadiness	DBN, mild ataxia of gait & stance	+	5	m.v.	m.v.	24	67.65	65.79
27	82.8333	f	blurred vision gait unsteadiness	DBN, mild ataxia of gait & stance	+	m.v.	5	19	28	0	0
